# Supplementary material for: Precise modulation of electron spin states in metal-organic framework towards exceptional oxygen evolution reaction
Source: Research Square preprint supplement (doi:10.21203/rs.3.rs-5541146/v1), 2024-12-09
Supplement: Supplementary file 1 [file eeea52c246bee00fc259e8ba.docx]

**Precise modulation of electron spin states in metal-organic framework towards exceptional oxygen evolution reaction**

Xianbiao Hou a, Tengjia Ni a, Zhaozheng Zhang a, Jian Zhou a, Shucong Zhang a, Shuixing Dai a, Lei Chu a, Huanlei Wang a, Bolong Huang b, *, Minghua Huang a, *

a School of Materials Science and Engineering, Ocean University of China, Qingdao 266100, China

b Department of Applied Biology and Chemical Technology, The Hong Kong Polytechnic University, Hung Hom, Kowloon, Hong Kong SAR, China

Corresponding author. E-mail: [bhuang@polyu.edu.hk](mailto:bhuang@polyu.edu.hk), [huangminghua@ouc.edu.cn](mailto:huangminghua@ouc.edu.cn)


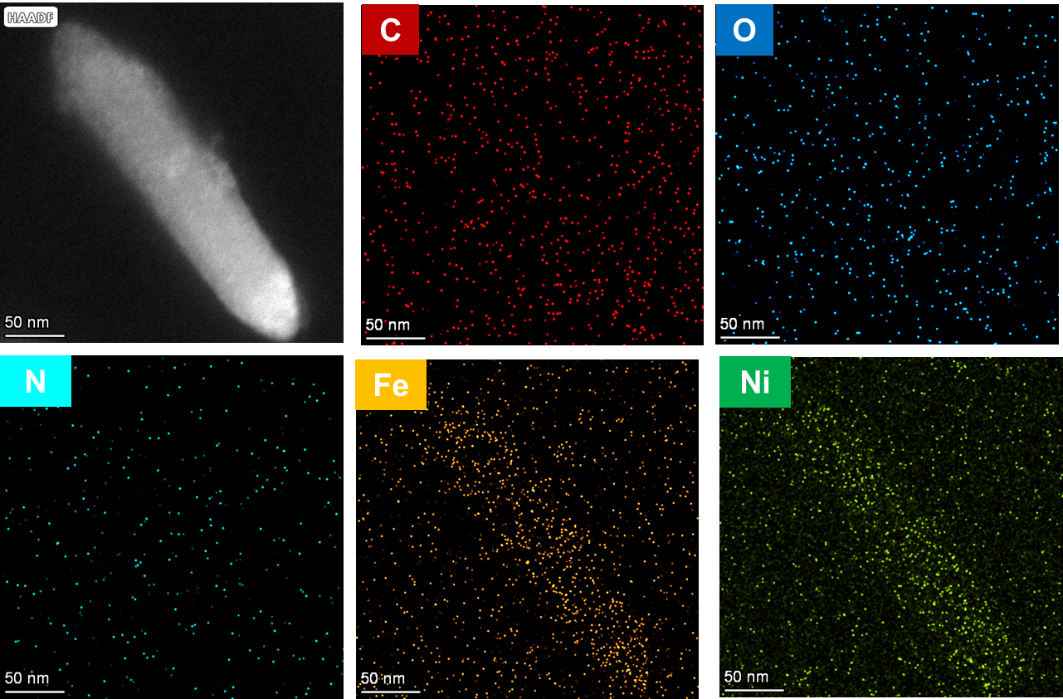


Figure S1. HAADF-STEM and corresponding elemental mapping images of NiFe-MOF-D3

Figure S2. The XPS survey spectra of NiFe-MOF-D0 and NiFe-MOF-D3.

Figure S3. The XPS valence bands of these obtained catalysts.


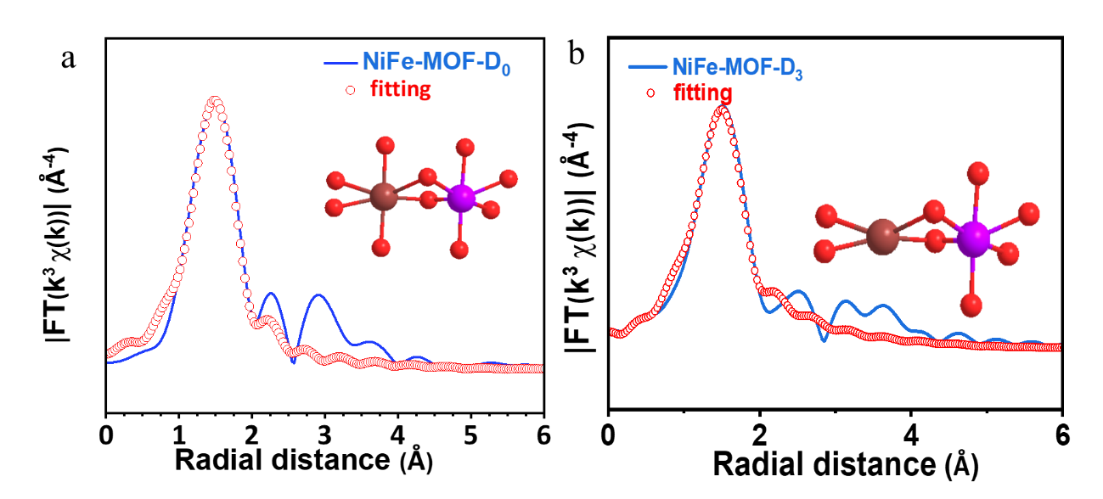


Figure S4. The k3-weighted EXAFS fitting curves of Fe at R space. (a) NiFe-MOF-D0 and (b) NiFe-MOF-D3.


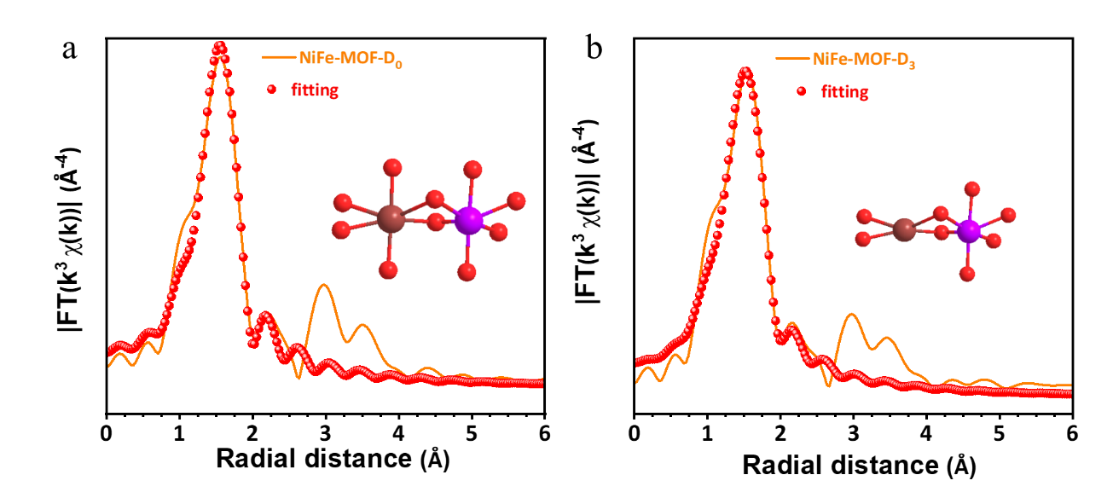


Figure S5. The k3-weighted EXAFS fitting curves of Ni at R space. (a) NiFe-MOF-D0 and (b) NiFe-MOF-D3.


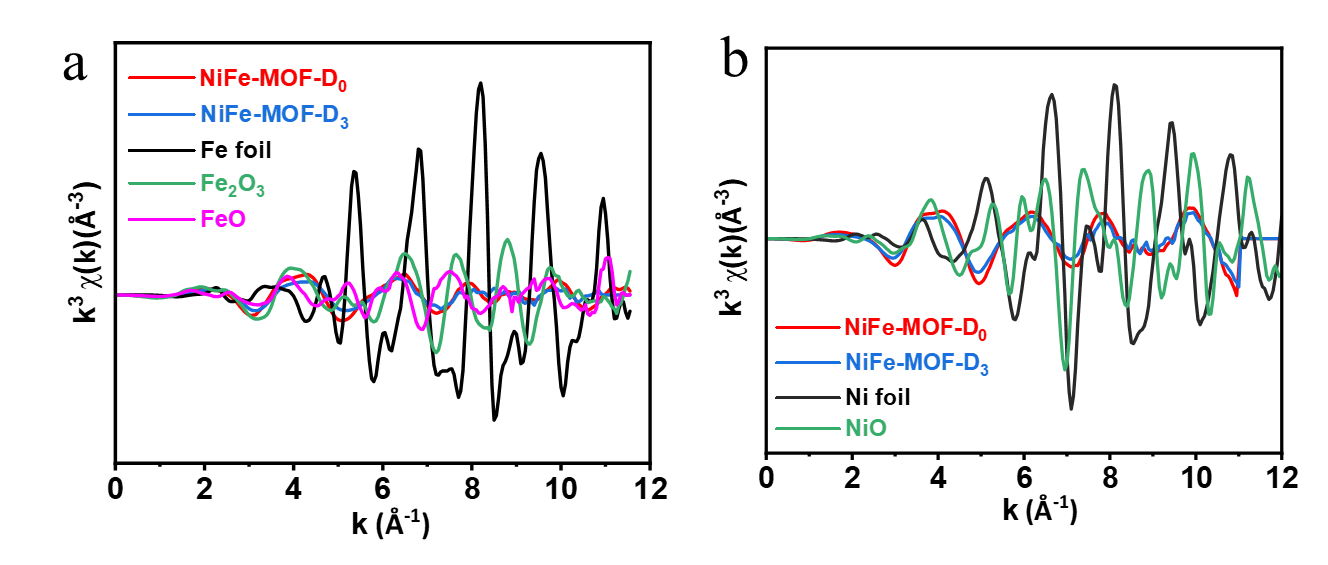


Figure S6. The k3-weighted EXAFS fitting curves at k space. (a) Fe, (b) Ni.


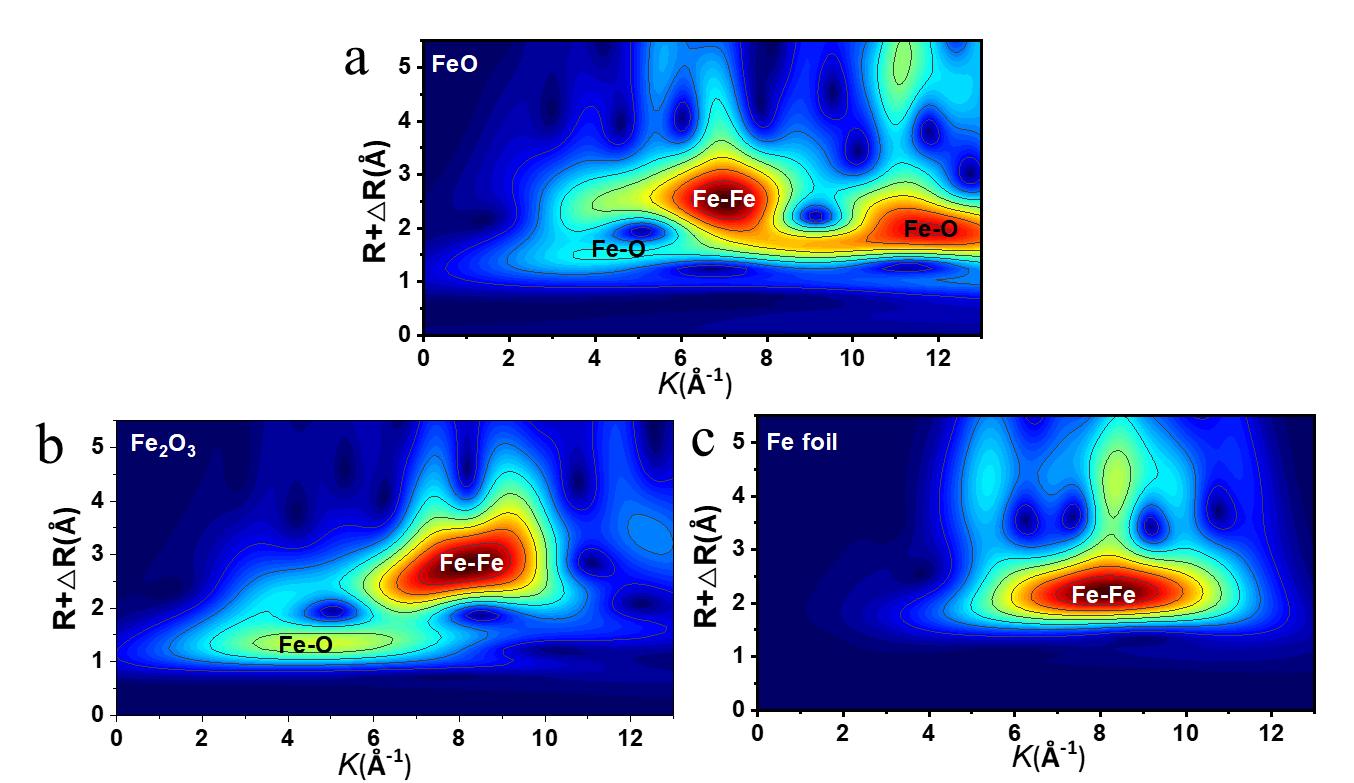


Figure S7. Wavelet transform of Fe K-edge EXAFS spectra. (a) FeO, (b) Fe2O3, and (c) Fe foil.


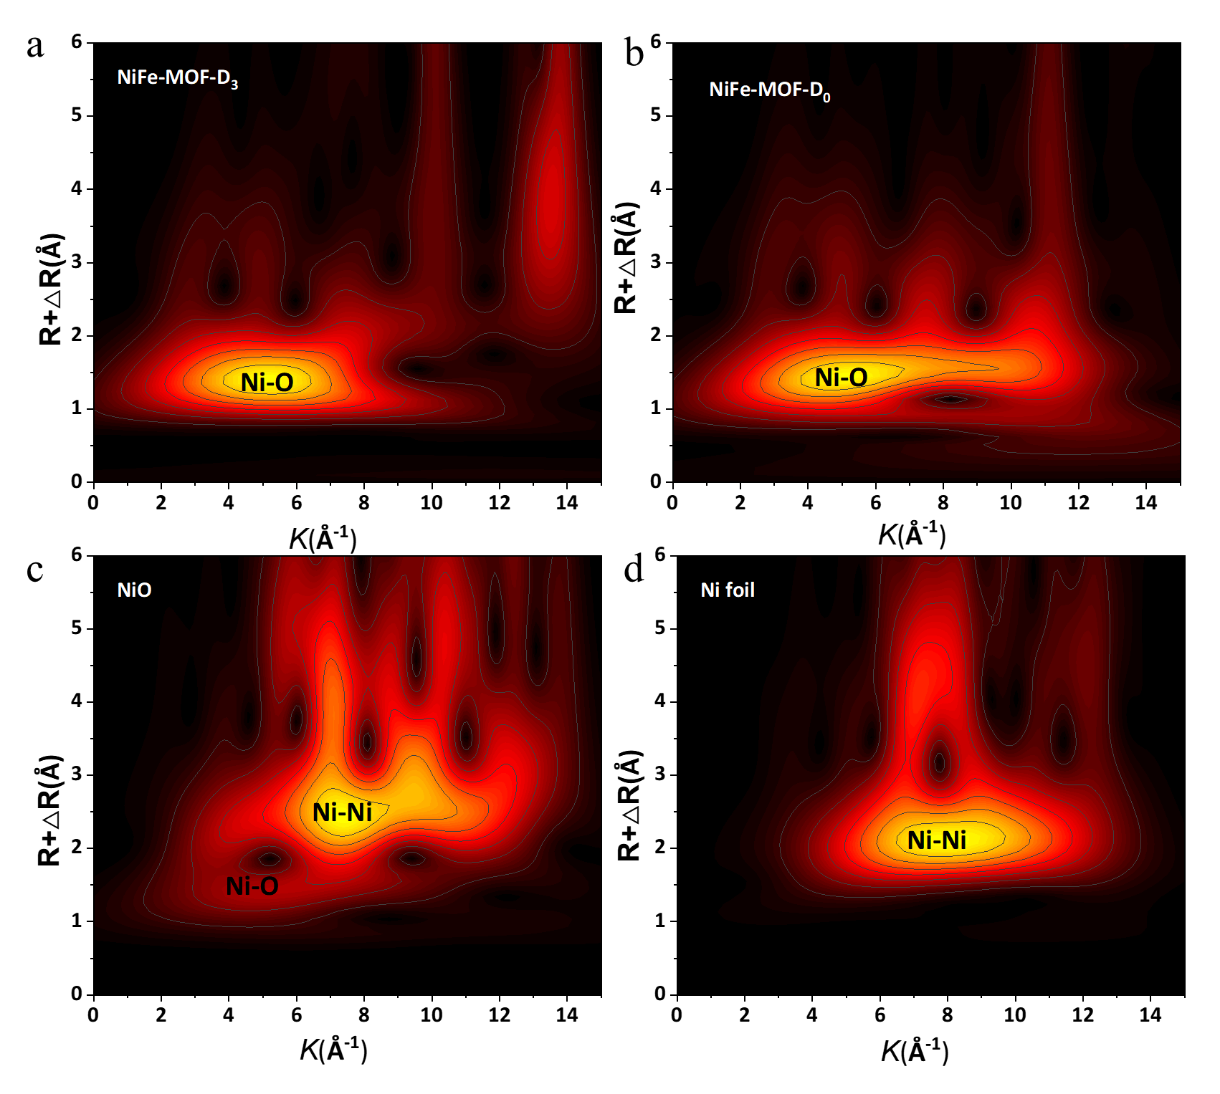


Figure S8. Wavelet transform of Ni K-edge EXAFS spectra. (a) NiFe-MOF-D3, (b) NiFe-MOF-D0, (c) NiO, and (d) Ni foil.


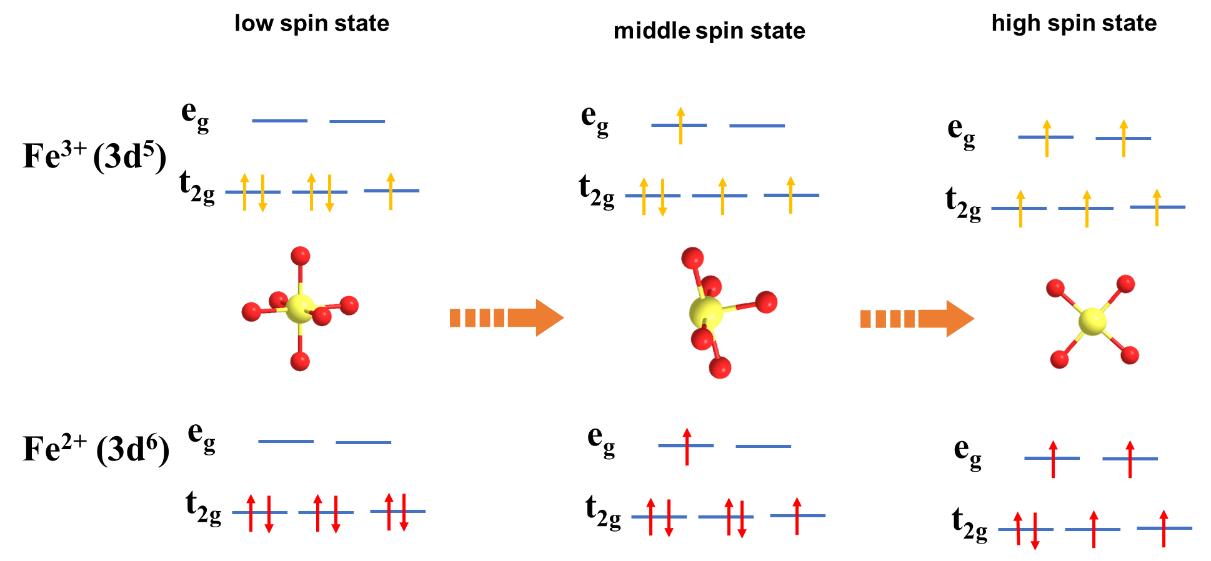


Figure S9. The transitions of Fe 3d electron configuration in different spin states on the catalysts.


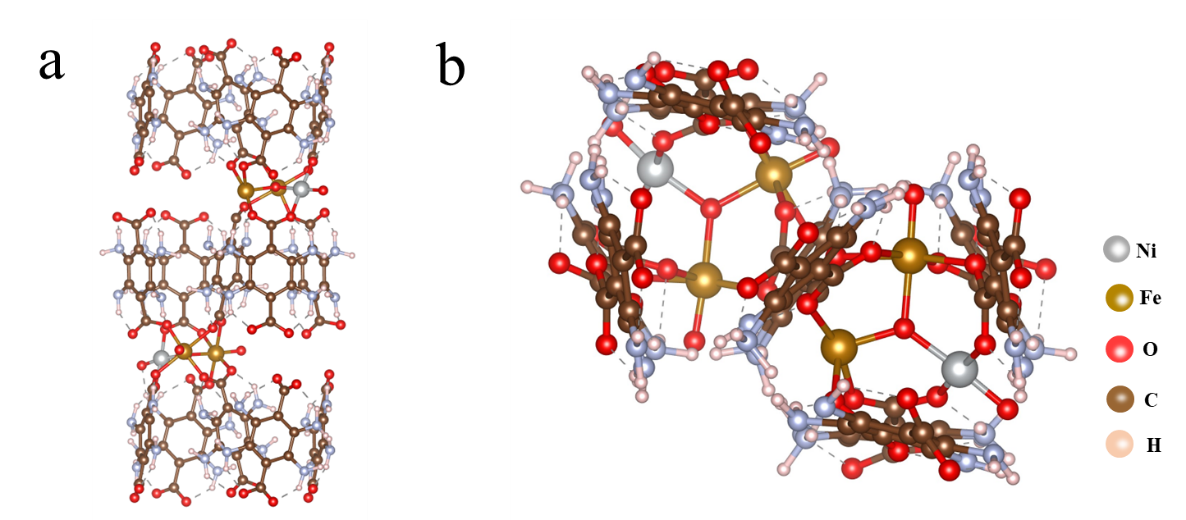


Figure S10. The NiO6-FeO4 model structure within NiFe-MOF, (a) side view, (b) top view.


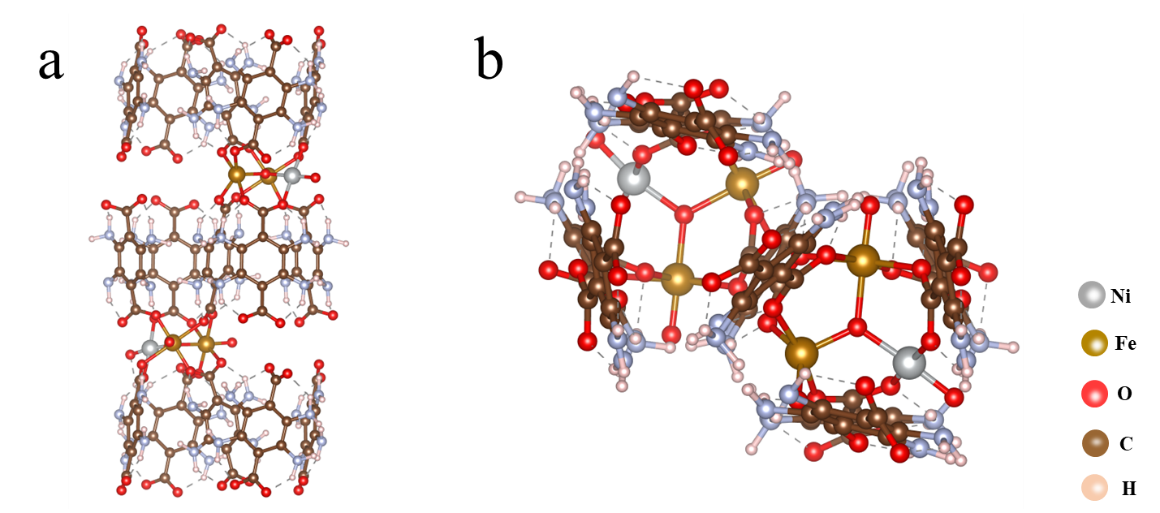


Figure S11. The NiO6-FeO5 model structure within NiFe-MOF, (a) side view, (b) top view.


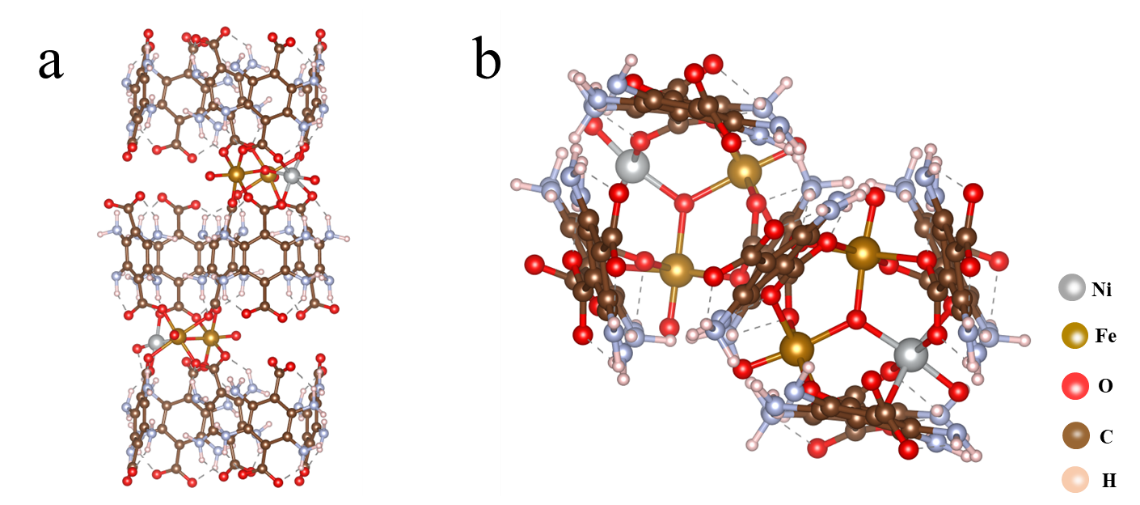


Figure S12. The NiO6-FeO6 model structure within NiFe-MOF, (a) side view, (b) top view.


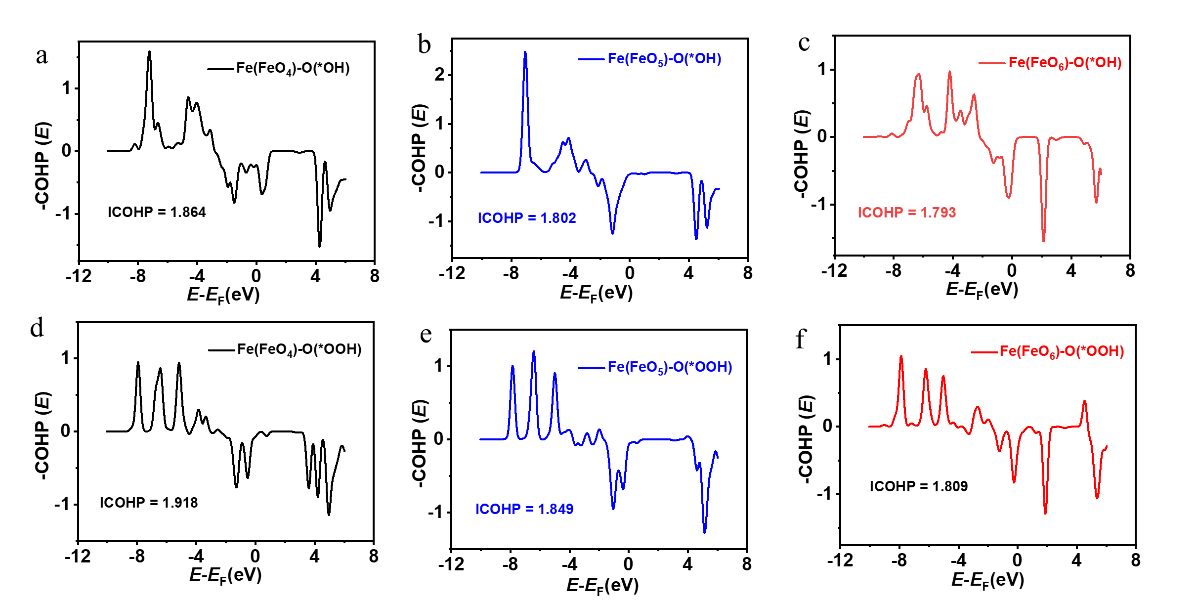


Figure S13. The COHP analysis of (a, d) NiO6-FeO6, (b, e) NiO6-FeO5, and (c, f) NiO6-FeO4 models after the adsorption of OH* and OOH*.


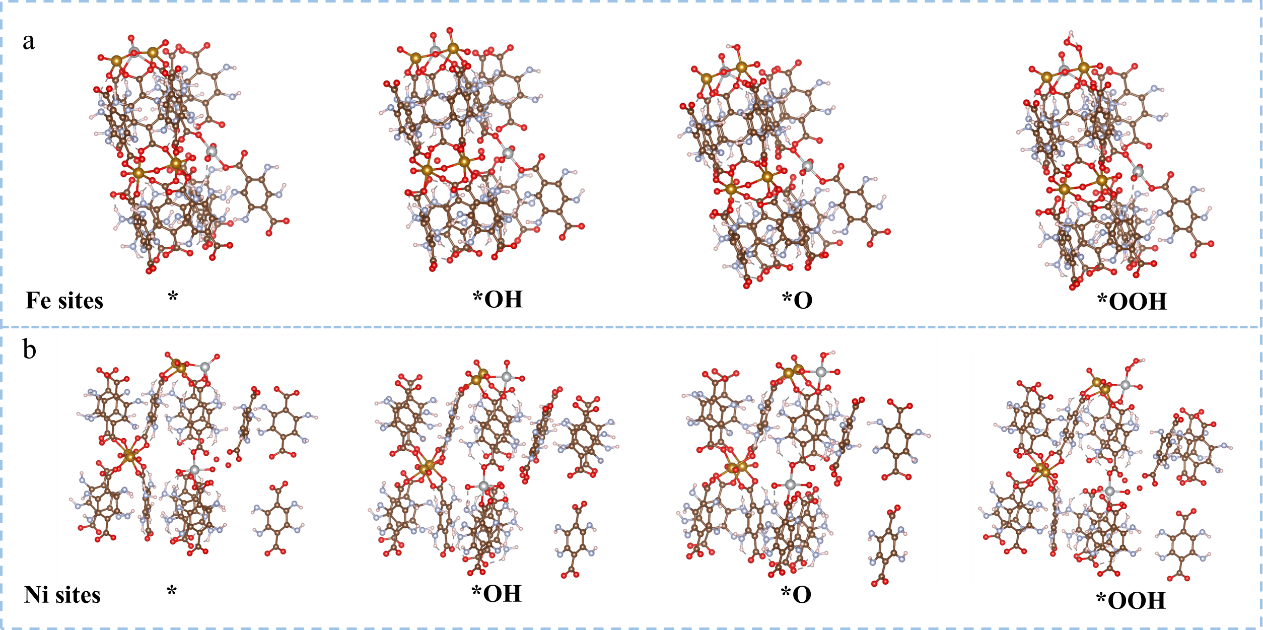


Figure S14. The OER pathway for the NiO6-FeO6 model of NiFe-MOF at (a) Fe sites, and (b) Ni Sites.


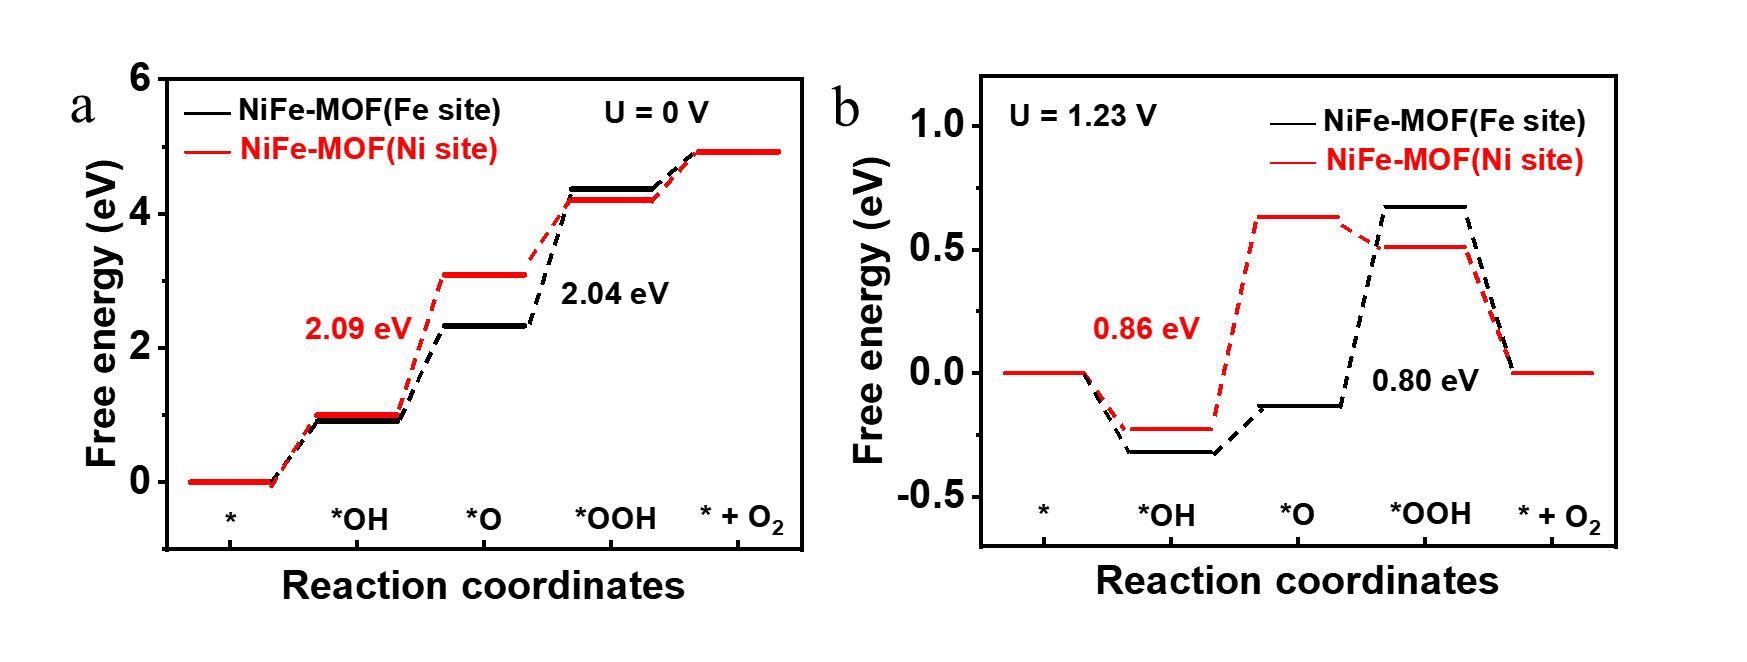


Figure S15. The free energy diagrams at different metal sites within NiO6-FeO6 model of NiFe-MOF during the OER process: (a) U = 0V, (b) U=1.23 V.


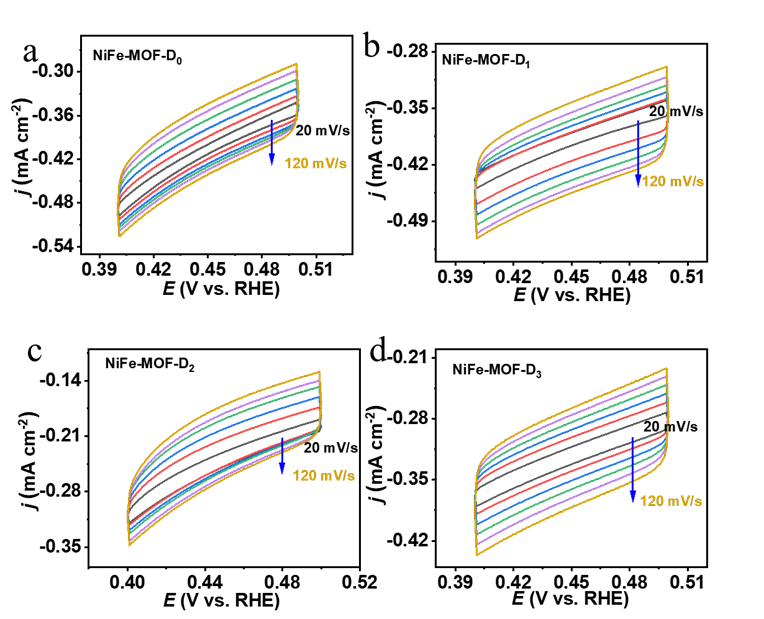


Figure S16. The cyclic voltammetry curves of (a) NiFe-MOF-D0, (b) NiFe-MOF-D1, (c) NiFe-MOF-D2, and (d) NiFe-MOF-D3 with different scan rates from 20 to 120 mVs-1.

Figure S17. The LSV curves normalized by ECSA for these obtained catalysts.

Figure S18. Cyclic voltammetry curves of these obtained catalysts in PBS solution at a scan rate of 50 mV s-1.


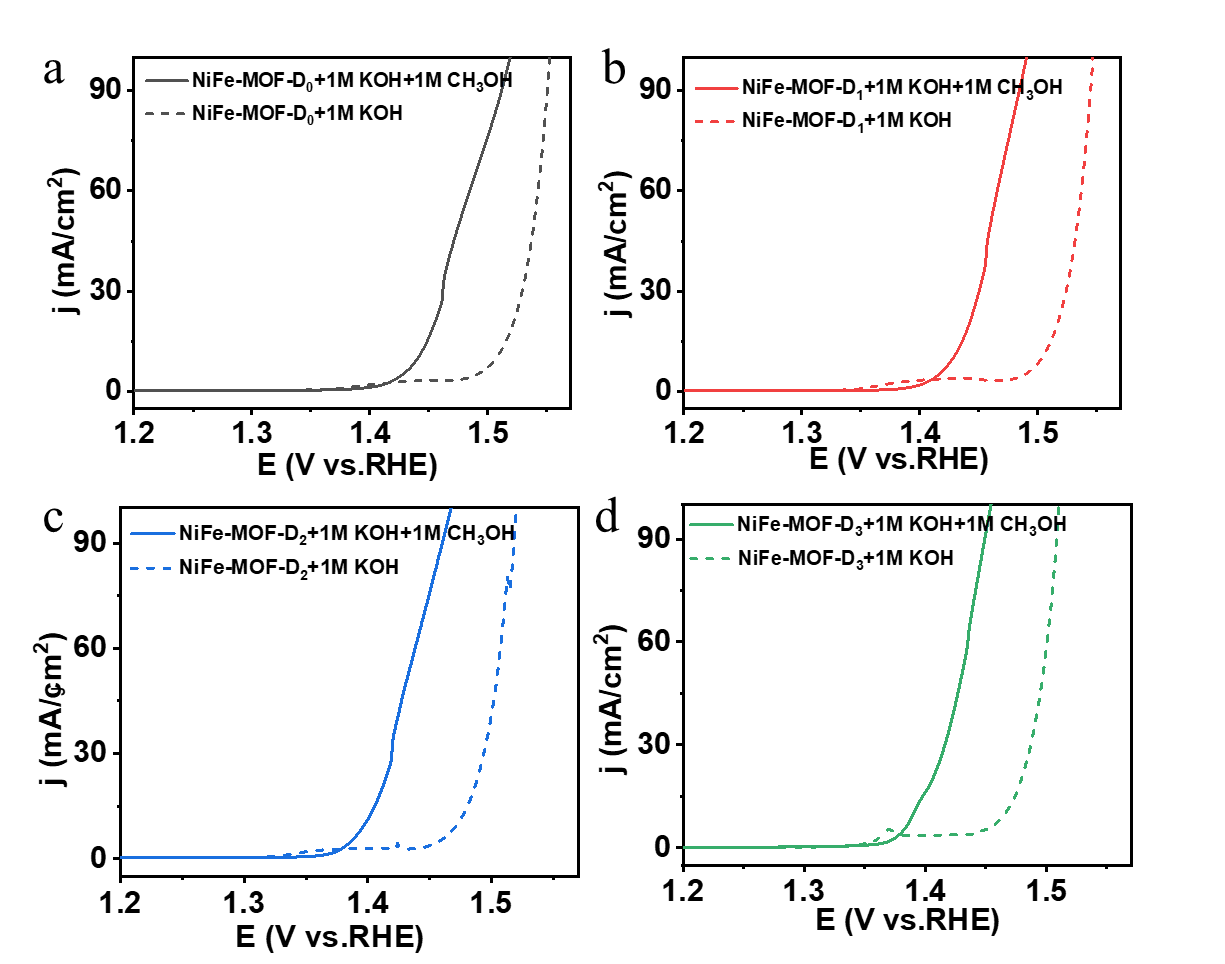


Figure S19. Polarization curves of (a)NiFe-MOF-D0, (b) NiFe-MOF-D1, (c) NiFe-MOF-D2, and (d) NiFe-MOF-D3 in 1.0 M KOH solution with or without adding 1.0 M CH3OH.


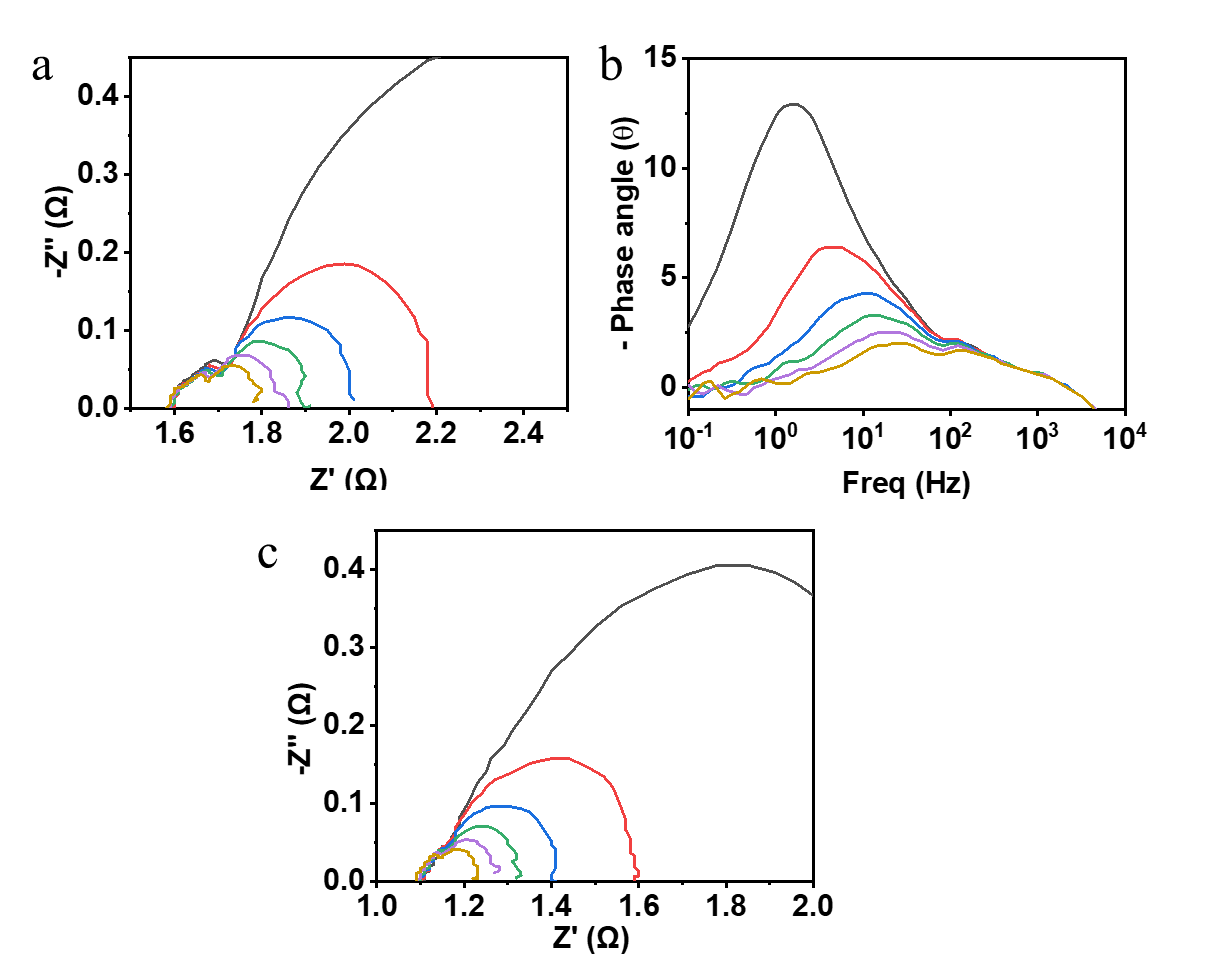


Figure S20. (a) Nyquist plots and (b) Bode phase plots for NiFe-MOF-D0. (c) Nyquist plots for NiFe-MOF-D3. The voltage range tested is from 1.25 V to 1.50V.

Figure S21. The corresponded Rct values at different potentials for NiFe-MOF-D0 and NiFe-MOF-D3.


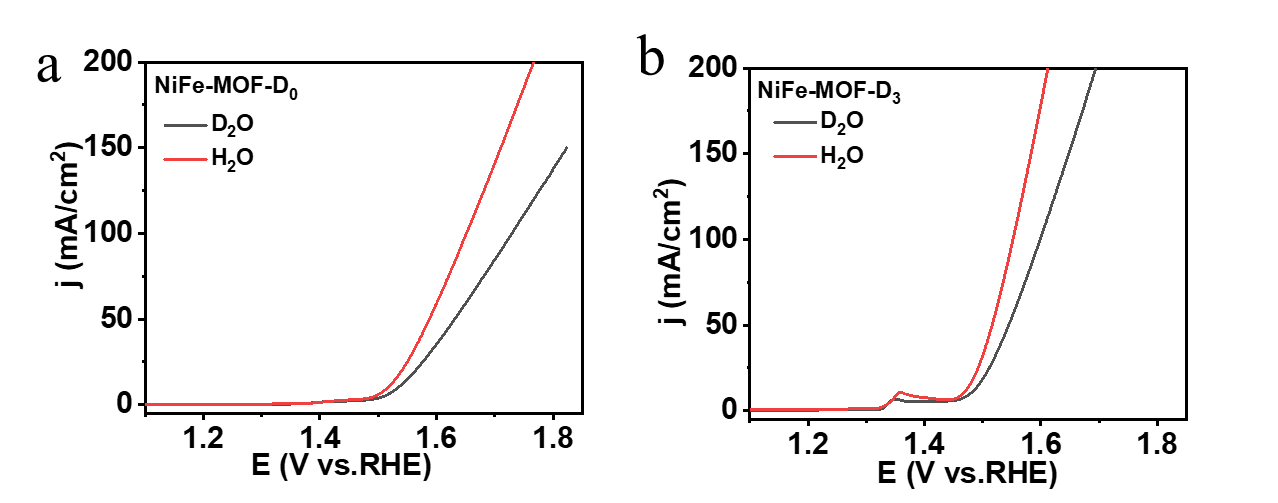


Figure S22. Polarization curves of (a)NiFe-MOF-D0, (b) NiFe-MOF-D3 in 1.0 M KOH dissolved in H2O and D2O.

Table S1. EXAFS fitting parameters at the Ni K-edge for the Ni foil, NiO, NiFe-MOF-D0, and NiFe-MOF-D3.

| Sample | Shell | *CNa* | *R*(Å)*b* | *σ*2(Å2)*c* | Δ*E*0(eV)*d* | *R* factor |
| --- | --- | --- | --- | --- | --- | --- |
| Ni foil | Ni-Ni | 12.0* | 2.48 | 0.0061 | 7.33 | 0.0018 |
| NiO | Ni-O | 6.0* | 2.09 | 0.0067 | -1.13 | 0.0043 |
| Ni-Ni | 12* | 2.95 | 0.0064 | -3.46 |
| NiFe-MOF-D0 | Ni- O | 6.3 | 2.04 | 0.0041 | -1.44 | 0.0094 |
| NiFe-MOF-D3 | Ni- O | 6.1 | 2.03 | 0.0077 | -3.86 | 0.0087 |

Table S2. EXAFS fitting parameters at the Fe K-edge for the Fe foil, Fe2O3, FeO, NiFe-MOF-D0, and NiFe-MOF-D3.

| Sample | Shell | *CNa* | *R*(Å)*b* | *σ*2(Å2)*c* | Δ*E*0(eV)*d* | *R* factor |
| --- | --- | --- | --- | --- | --- | --- |
| Fe foil | Fe- Fe | 8* | 2.46 | 0.0048 | 4.09 | 0.0037 |
| Fe- Fe | 6* | 2.86 | 0.0038 | 5.33 |
| Fe2O3 | Fe-O1 | 6.7 | 1.96 | 0.0081 | -5.78 | 0.0066 |
| Fe-O2 | 1.5 | 2.14 | 0.0029 | -5.34 |
| Fe-Fe1 | 7.9 | 2.98 | 0.0077 | -0.33 |
| Fe-Fe2 | 4.0 | 3.45 | 0.0037 | 14.71 |
| FeO | Fe-O1 | 3.8 | 2.17 | 0.0025 | 12.82 | 0.0049 |
| Fe-O2 | 5.8 | 2.36 | 0.0108 | 1.10 |
| Fe-Fe1 | 6.0 | 3.03 | 0.0108 | -1.57 |
| NiFe-MOF-D0 | Fe-O | 5.8 | 2.01 | 0.0096 | 0.24 | 0.0055 |
| NiFe-MOF-D3 | Fe-O | 4.4 | 1.99 | 0.0101 | -0.53 | 0.0040 |

Table S3. Comparisons of overpotential and Tafel slope for the as-synthesized NiFe-MOF-D3 in this work and related electrocatalysts in the literatures.

| **Catalysts** | **j (A cm-2)** | | **η (mV)** | **Stability** | **Reference** |
| --- | --- | --- | --- | --- | --- |
| NiFe-MOF-D3 | | 0.5  1.0 | 285  328 | 170 h @500 mA cm-2 | This work |
| 1.5 | 365 |
| NiMOF-Ni2P/IF | | 1.0 | 330 | 100 h @500 mA cm-2 | Chem. Eng. J. 2024, 497, 154483 |
| Ru@Cr-FeMOF | | 1.0 | 348 | 80000 s @20 mA cm-2 | Adv. Funct. Mater. 2024, 34, 2307917 |
| Fe-MOFs-SO3 | | 1.0 | 330 | 100 h @1000 mA cm-2 | Adv. Energy Mater. 2020, 10, 2000184 |
| Er0.4Fe-MOF/NF | | 1.0 | 326 | 25 h @500 mA cm-2 | Nanomaterials. 2021, 11, 1847 |
| NiCo(OH)x@Co-MOF/NF | | 1.0 | 531 | 24 h @500 mA cm-2 | Int J Hydrogen Energy.  2022, 47, 31587-31595 |
| NiFe-MOF-74/NiFe-LDH | | 1.0 | 284 | 10 h @1000 mA cm-2 | Adv. Funct. Mater. 2023, 33, 2211260 |
| CoFeP TPAs/Ni | | 0.7 | 335 | 100 h @20 mA cm-2 | J. Mater. Chem. A. 2019, 7, 17529-17535 |
| NFN-MOF/NF | | 0.5 | 360 | 30 h @500 mA cm-2 | Adv. Energy Mater. 2018, 8, 1801065 |
| FeOOH-NiBDC-NF | | 0.5 | 316 | 100 h @500 mA cm-2 | Chem. Eng. J. 2022, 431, 134040 |
| Fe-doped-(Ni-MOFs)/FeOOH | | 0.4 | 314 | 120 h @10 mA cm-2 | Angew. Chem. Int. Ed. 2022, 61, e202116934 |
| CoCe-MOF/CP | | 0.2 | 539 | 70 h @100 mA cm-2 | Small 2024, 20, 2307685 |
| Er0.5Ni-BDC MOF | | 0.1 | 420 | 14 h @20 mA cm-2 | Energy & Fuels, 2024, 38, 5397-5406. |

Table S4. Comparisons of cell voltages of AEMWE for the NiFe-MOF-D3 // Pt/C in this work and related electrocatalysts in the literatures.

| **Catalysts** | **j (mA cm-2)** | **potential (V)** | **Reference** |
| --- | --- | --- | --- |
| NiFe-MOF-D3 | 500 | 1.77 | This work |
| Ni-Co-Fe-P NBs | 800 | 1.98 | Appl. Catal. B Environ. 2022, 310, 121353 |
| CeO2-NiCoPx/NCF | 300 | 1.78 | Appl. Catal. B Environ. 2022, 316, 121678 |
| F-CDs/CoP/NF | 240 | 1.81 | Adv. Energy Mater. 2022, 12, 2102573 |
| FeOx@Co0.75Fe0.25P | 100 | 1.67 | Adv. Sci. 2024, 11, 2403206 |
| Pd-NiFeB/NF | 500 | 1.81 | Appl. Catal. B Environ. 2024, 342, 123343 |
| NiCo₂O₄-B-CC | 400 | 2.0 | Adv. Funct. Mater. 2024, 2410439 |
| NiCoP | 500 | 1.815 | Adv. Energy Mater. 2023, 13, 2300499 |
| Ru SAs-MoO3−*x*/NF | 100 | 1.759 | Adv. Sci. 2023, 10, 2300342 |
| NiSAFeSA-Ni*x*Fe/CNT | 382 | 1.8 | ACS Catal. 2022, 12, 1167-1179 |
| 6%LS-CMMOFs | 500 | 1.85 | Appl. Catal. B Environ. 2022, 307, 121151 |
| Sn4P3/Co2P SCNAs | 80 | 1.72 | Appl. Catal. B Environ. 2022, 304, 120923 |

**Calculations of AEM electrolyzer efficiency and H2 cost**

H2 production rate @ 0.5 A cm-2

= (j A cm-2)(1 e-/1.602 ×10-19 C)(1 H2/2 e-)

= 0.5 A cm-2 / (1.602 × 10-19 C x 2)

= 2.59 × 10-6 mol H2 cm-2 s-1

LHV of H2

= 120 kJ g-1 H2 = 2.42 × 105 J mol-1 H2

H2 power out

= (2.59 × 10-6 mol cm-2 s-1) × (2.42 × 105 J mol-1)

= 0.627 W cm-2

Electrolyzer Power of NiFe-MOF-D3 // Pt/C @ 0.5 A cm-2

= (0.5 A cm-2) (1.61 V)

= 0.885 W cm-2

Efficiency of NiFe-MOF-D3 // Pt/C

= (H2 Power Out) / (Electrolyzer Power)

= 0.627 W cm-2/0.885 W cm-2

= 70.8 %

Efficiency of RuO2//Pt/C

= (H2 Power Out) / (Electrolyzer Power)

= 0.627 W cm-2/1.097 W cm-2

= 57.15%

Price per gasoline-gallon equivalent (GGE) H2

= 1GGE H2 / H2 production rate × Electrolyzer power × Electricity bill

= 0.997 kg / (2.59 × 10-6 mol H2.cm-2 s-1 × 2 kg/mol) × 0.885 W cm-2 × $ 0.02 / kW h

= $ 0.94 /GGE H2

<< $ 2 /GGE H2 of U.S. Department of Energy (DOE) by 2026
